# Supplementary material
Source: HighWire-hosted journal article supplement (https://www.cmajopen.ca/highwire/filestream/84925/field_highwire_adjunct_files/9/2020-0323-7-at.pdf)
Supplement: 2020-0323-7-at.pdf [file 2020-0323-7-at.pdf]

### Appendix 7. Acute care resource utilization by level of care and month between March 1 and September 30, 2020

| Level of care                                                | March       | April       | May        | June     | July     | August   | September |
|--------------------------------------------------------------|-------------|-------------|------------|----------|----------|----------|-----------|
| Including all individuals, frequency (proportions)*          |             |             |            |          |          |          |           |
| Hospitalization, n=5,383                                     | 1,226 (21%) | 2,069 (14%) | 1046 (10%) | 297 (5%) | 195 (5%) | 148 (4%) | 402 (3%)  |
| ICU, no ventilation, n=1,183                                 | 398 (32%)   | 362 (17%)   | 197 (19%)  | 64 (22%) | 50 (26%) | 29 (20%) | 83 (21%)  |
| ICU, ventilation, n=712                                      | 269 (68%)   | 239 (66%)   | 106 (54%)  | 31 (48%) | 17 (34%) | 15 (52%) | 35 (42%)  |
| Excluding those from LTC outbreaks, frequency (proportions)* |             |             |            |          |          |          |           |
| Hospitalization, n=4,457                                     | 1,176 (21%) | 1,490 (14%) | 839 (10%)  | 262 (5%) | 186 (5%) | 143 (4%) | 361 (3%)  |
| ICU, no ventilation, n=1,113                                 | 394 (34%)   | 318 (21%)   | 186 (22%)  | 59 (23%) | 48 (26%) | 29 (20%) | 79 (22%)  |
| ICU, ventilation, n=681                                      | 266 (68%)   | 215 (68%)   | 104 (56%)  | 29 (49%) | 17 (35%) | 15 (52%) | 35 (44%)  |

\* Proportion of hospitalizations are number of hospitalizations over the total number of cases for that month by “case created” date. Proportion of ICU, no ventilation, is the number of ICU admissions for those not needing ventilators over the number of hospitalizations for that month. Proportion of ICU, ventilation is the number of individuals requiring ventilators over the total number of individuals admitted to the ICU during that month.

ICU, intensive care unit; LTC, long-term care
